# Supplementary material for: The Effects of Modifying Amount and Type of Dietary Carbohydrate on Esophageal Acid Exposure Time and Esophageal Reflux Symptoms: A Randomized Controlled Trial
Source: PubMed Central journal article supplement — Am J Gastroenterol. 2022 Jun 21;117(10):1655–67. doi: 10.14309/ajg.0000000000001889 (PMC9531994; doi:10.14309/ajg.0000000000001889), 2022-06-21
Supplement: acg-117-1655-s001.pdf [file acg-117-1655-s001.pdf]

## Supplementary Table 1:

### Strategies for Reducing Simple Carbohydrate (Simple Sugars) Intake

|                                                                                                                                                                                                 |
|-------------------------------------------------------------------------------------------------------------------------------------------------------------------------------------------------|
| <b>1. <u>Reduce</u> the amount or frequency that you consume high sugar food and beverage items – consume smaller portions or consume these high sugar items less often</b>                     |
| Sugar: white sugar, brown sugar, cane sugar                                                                                                                                                     |
| Syrups: maple syrup, honey, molasses, rice syrup, corn syrup, malt syrup, caramel                                                                                                               |
| Dessert Items: cookies, cakes, brownies, pies, ice cream, donuts, whipped cream, candy, jello, pudding                                                                                          |
| Sugar-sweetened Tea (“sweet tea”)                                                                                                                                                               |
| Sugar-sweetened Fruit drinks / Lemonade / Limeade                                                                                                                                               |
| Regular Soda / Cola                                                                                                                                                                             |
| Whipped or Sweetened Coffee drinks (like Frappuccino or Latte or Frappé)                                                                                                                        |
| Sports drinks / Energy drinks                                                                                                                                                                   |
| Smoothies / Milk shakes / Slushes                                                                                                                                                               |
| <b>2. <u>Replace</u> higher sugar items with a lower sugar or unsweetened version of the food item</b>                                                                                          |
| Replace canned fruit packed in syrup with canned fruit packed in water                                                                                                                          |
| Replace regular applesauce with unsweetened applesauce                                                                                                                                          |
| Replace milk chocolate with dark chocolate                                                                                                                                                      |
| Replace granola bars with high protein bars                                                                                                                                                     |
| Replace high sugar breakfast cereals with low sugar cereals                                                                                                                                     |
| Replace ice cream or gelato with low sugar frozen desserts                                                                                                                                      |
| Replace white bread with whole grain bread, replace white pasta with whole grain pasta                                                                                                          |
| <b>3. <u>Review</u> the ingredients list on food items that may not be obviously high in sugar - like dried fruits or popcorn or snack chips or peanut butter that have sugar added to them</b> |
| Choose fresh or frozen fruit                                                                                                                                                                    |
| Choose unsweetened or natural versions of these foods                                                                                                                                           |
| <b>4. <u>Revise</u> recipes or food preparation methods</b>                                                                                                                                     |
| Use sugar alternatives like Splenda or Stevia in coffee or tea or unsweetened applesauce in baking                                                                                              |
| <b>5. <u>Read</u> the Nutrition Facts on the food label</b>                                                                                                                                     |
| Choose items with less than 5grams of Added Sugars per 100 gram serving                                                                                                                         |
