# Supplementary material for: The Effects of Modifying Amount and Type of Dietary Carbohydrate on Esophageal Acid Exposure Time and Esophageal Reflux Symptoms: A Randomized Controlled Trial
Source: PubMed Central journal article supplement — Am J Gastroenterol. 2022 Jun 21;117(10):1655–67. doi: 10.14309/ajg.0000000000001889 (PMC9531994; doi:10.14309/ajg.0000000000001889), 2022-06-21
Supplement: acg-117-1655-s002.pdf [file acg-117-1655-s002.pdf]

**Supplementary Table 2. Results for Primary and Secondary Outcomes from Subgroup Analysis Based on Lyon Consensus Criteria**

|                                        | HTHS            |                   | HTLS            |                   | LTHS            |                   | LTLS            |                   |  |
|----------------------------------------|-----------------|-------------------|-----------------|-------------------|-----------------|-------------------|-----------------|-------------------|--|
|                                        | Pathologic GERD | Inconclusive GERD |  |
| <b>Esophageal Acid Exposure Time</b>   |                 |                   |                 |                   |                 |                   |                 |                   |  |
| Baseline                               | 8.9 ± 14.1      | 4.9 ± 5.4         | 17.2 ± 28.1     | 5.5 ± 6.6         | 15.5 ± 12.6     | 5.7 ± 4.4         | 9.6 ± 6.5       | 5.2 ± 4.8         |  |
| Final                                  | 7.1 ± 5.4       | 3.3 ± 2.6         | 10.1 ± 10.5     | 3.4 ± 4.7         | 9.1 ± 6.2       | 3.5 ± 4.7         | 8.8 ± 3.3       | 3.4 ± 2.9         |  |
| Change                                 | 1.9 ± 5.5       | 1.6 ± 2.8         | 7.1 ± 13.3**    | 2.2 ± 4.5*        | 6.4 ± 8.6**     | 2.2 ± 1.8**       | 1.8 ± 4.1*      | 1.8 ± 2.5*        |  |
| <b>Total Number of Reflux Episodes</b> |                 |                   |                 |                   |                 |                   |                 |                   |  |
| Baseline                               | 182.3 ± 64.2    | 69.4 ± 72.5       | 171.7 ± 105.8   | 65.5 ± 26.0       | 183.9 ± 148.7   | 55.9 ± 49.7       | 165.8 ± 93.9    | 51.3 ± 37.7       |  |
| Final                                  | 149.7 ± 37.4    | 49.1 ± 52.5       | 138.2 ± 68.9    | 39.5 ± 34.1       | 132.4 ± 81.2    | 47.6 ± 37.6       | 150.4 ± 89.9    | 31.5 ± 31.8       |  |
| Change                                 | 33.5 ± 59.9     | 20.2 ± 22.5       | 33.5 ± 31.8**   | 25.9 ± 24.7*      | 51.6 ± 75.2*    | 8.3 ± 24.5        | 14.2 ± 58.9     | 9.8 ± 16.9        |  |
| <b>GERDQ Score</b>                     |                 |                   |                 |                   |                 |                   |                 |                   |  |
| Baseline                               | 6.3 ± 2.6       | 7.0 ± 2.6         | 6.4 ± 4.5       | 6.4 ± 3.6         | 5.9 ± 3.1       | 8.5 ± 5.1         | 5.9 ± 3.9       | 6.4 ± 1.9         |  |
| Final                                  | 4.7 ± 3.8       | 6.3 ± 4.0         | 2.2 ± 2.7       | 3.2 ± 3.4         | 3.4 ± 3.4       | 5.7 ± 2.5         | 3.4 ± 3.1       | 3.0 ± 1.4         |  |
| Change                                 | 1.5 ± 4.2       | 0.7 ± 5.5         | 4.3 ± 4.3**     | 3.2 ± 4.1*        | 2.5 ± 3.1*      | 2.8 ± 3.3*        | 2.5 ± 3.6*      | 3.4 ± 3.0**       |  |
| <b>GSAS Score</b>                      |                 |                   |                 |                   |                 |                   |                 |                   |  |
| Baseline                               | 9.8 ± 5.5       | 9.8 ± 6.9         | 10.6 ± 8.9      | 9.8 ± 6.3         | 8.8 ± 4.9       | 10.5 ± 5.4        | 9.1 ± 7.2       | 10.4 ± 8.0        |  |
| Final                                  | 5.8 ± 7.1       | 6.0 ± 0.8         | 3.6 ± 3.5       | 4.5 ± 4.6         | 4.2 ± 3.9       | 5.0 ± 3.8         | 5.4 ± 4.8       | 3.8 ± 3.7         |  |
| Change                                 | 4.0 ± 5.5*      | 3.8 ± 4.6*        | 7.0 ± 6.5**     | 5.3 ± 5.1**       | 4.6 ± 4.4**     | 5.5 ± 4.7**       | 4.0 ± 5.2*      | 6.6 ± 6.0**       |  |

Within Group Differences: \*P<0.05, \*\*P<0.01, \*\*\*P<0.001
